# Supplementary material for: Graphitic carbon nitride decorated with C–N compounds broken by s-triazine unit as homojunction for photocatalytic H2 evolution
Source: Royal Society of Chemistry journal article supplement (doi:10.1039/d2ta08491k), 2022-12-02
Supplement: d2ta08491k1.pdf [file d2ta08491k1.pdf]

## Supporting Information

### **Graphitic carbon nitride decorated with C-N compounds broken by s-triazine unit as homojunction for photocatalytic H<sub>2</sub> evolution**

Yixuan Lv<sup>a</sup>, Dandan Ma<sup>a</sup>, Kunli Song<sup>a</sup>, Siman Mao<sup>a</sup>, Zhetong Liu<sup>a</sup>, Dan He<sup>b</sup>, Xuewen Zhao<sup>a</sup>,  
Tianhao Yao<sup>a</sup>, Jian-Wen Shi<sup>\*a</sup>

<sup>a</sup> *State Key Laboratory of Electrical Insulation and Power Equipment, Center of Nanomaterials for  
Renewable Energy, School of Electrical Engineering, Xi'an Jiaotong University, Xi'an 710049,  
China*

<sup>b</sup> *Instrument Analysis Center of Xi'an Jiaotong University, Xi'an 710049, China*

\* Corresponding author

E-Mail: jianwen.shi@mail.xjtu.edu.cn (J.-W. Shi)

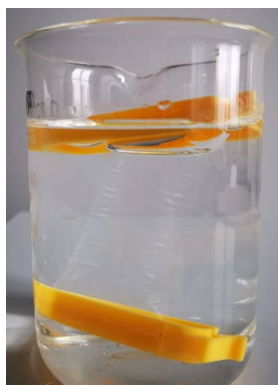

**Fig. S1.** The digital photos of dialysis process.

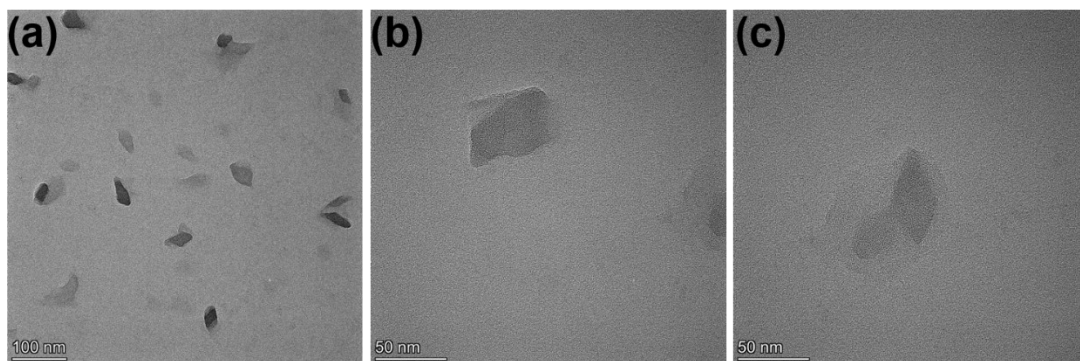

**Fig. S2.** TEM images of BST-CN

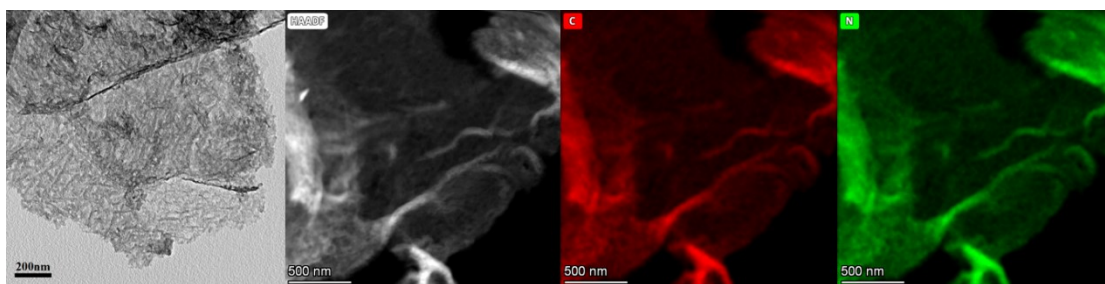

**Fig. S3.** TEM and EDS mapping images of g-C<sub>3</sub>N<sub>4</sub> nanosheets

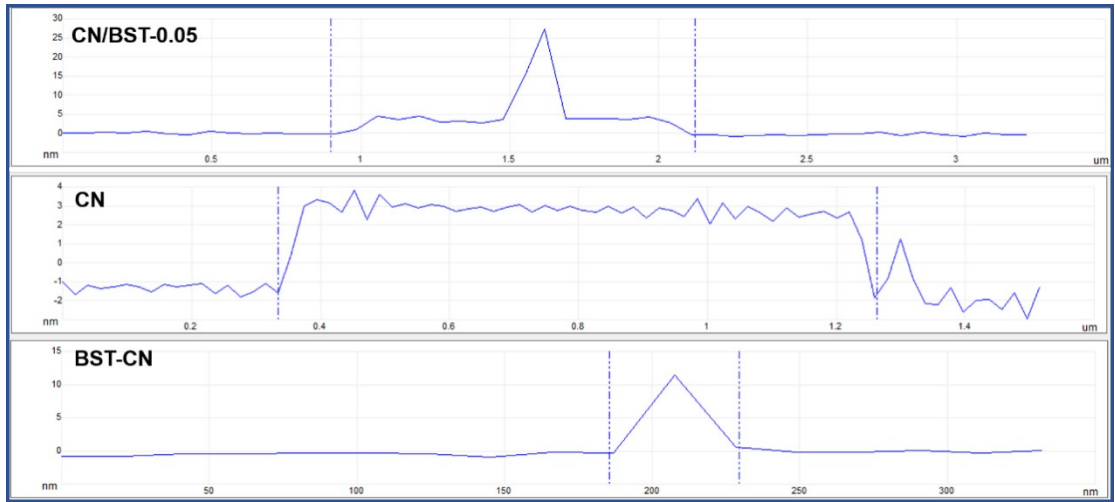

**Fig. S4.** Corresponding height analysis of CN/BST-0.05, g-C<sub>3</sub>N<sub>4</sub> nanosheets (CN) and BST-CN.

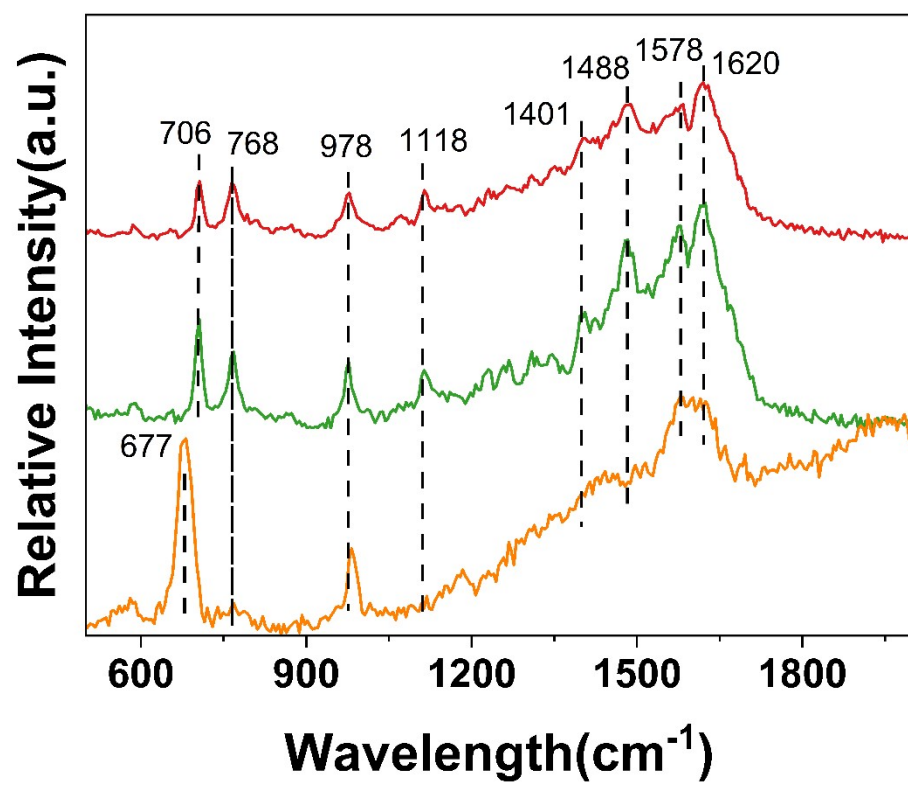

Fig. S5. Raman spectra of CN, BST and CN/BST-0.05.

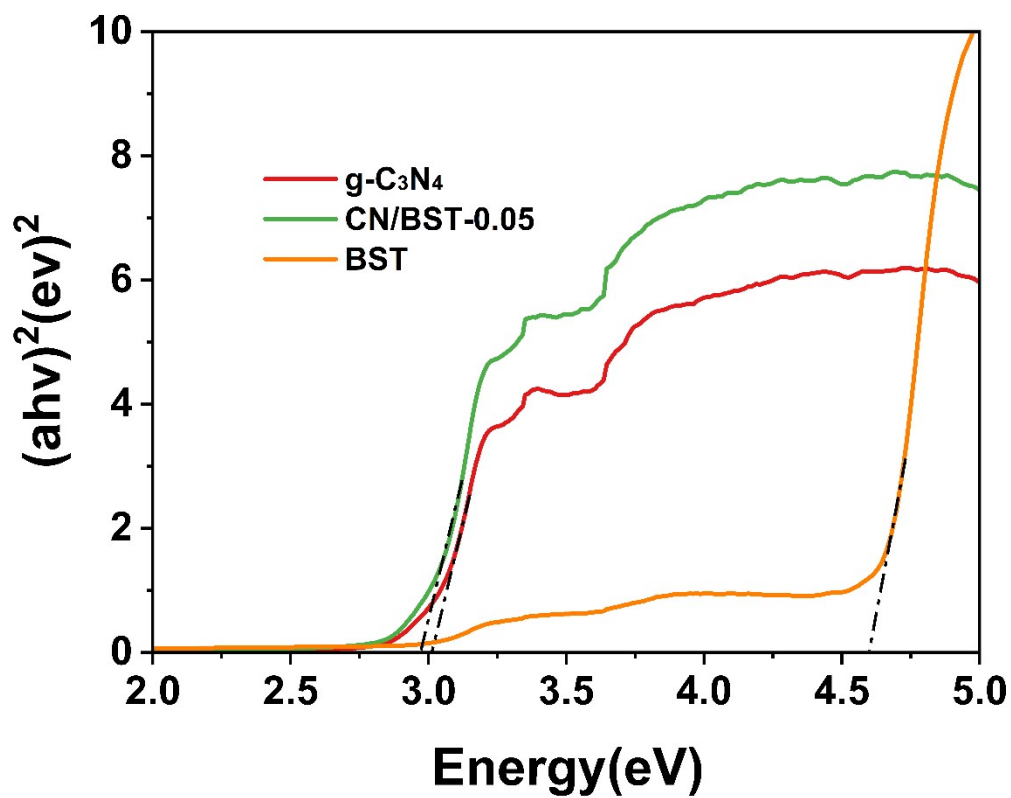

Fig. S6. Corresponding Taus plots of  $\text{g-C}_3\text{N}_4$ ,  $\text{BST-CN}$  and  $\text{CN/BST-0.05}$ .

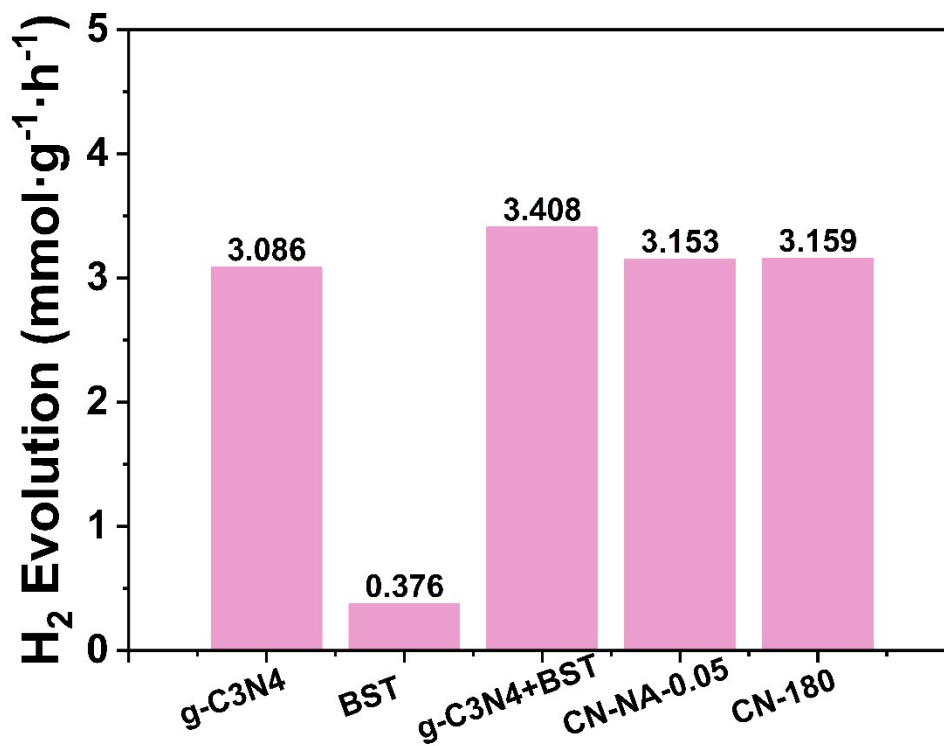

Fig. S7. PHE performance of supplementary reference samples.



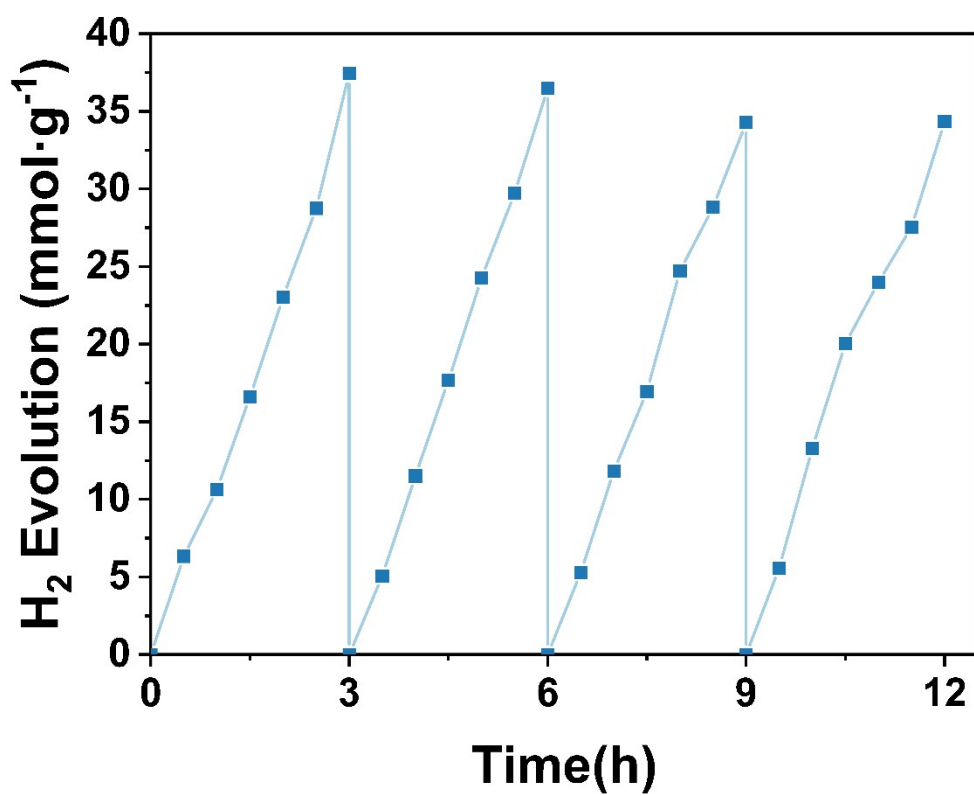

Fig. S8. PHE performance of CN/BST-0.05 catalyst in 4 cycles of tests.

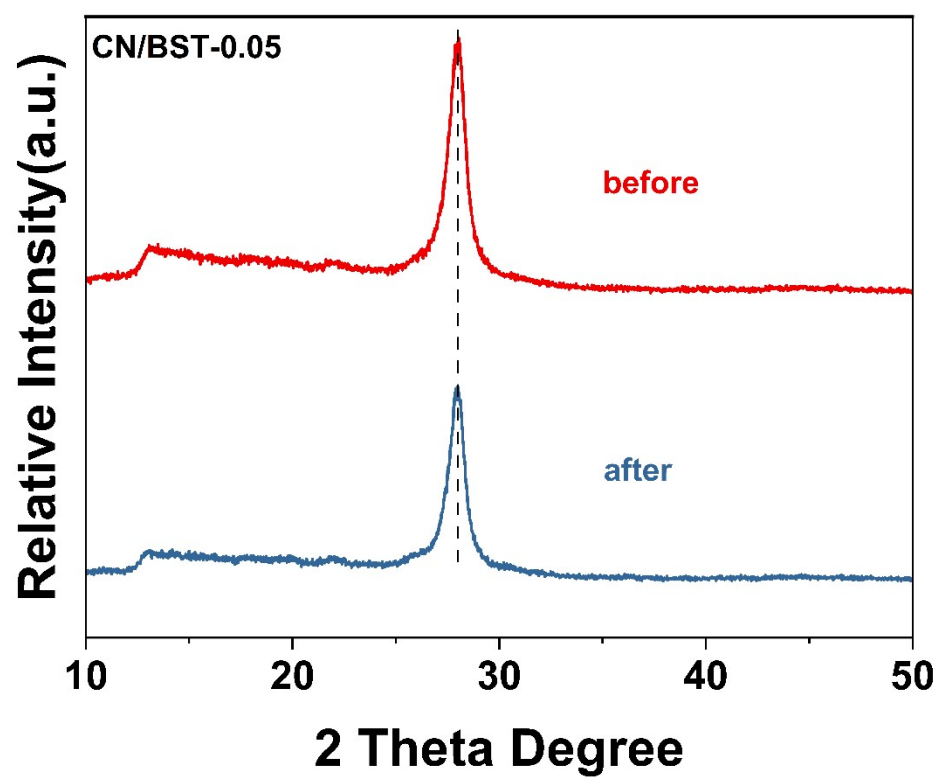

Fig. S9. XRD pattern of CN/BST-0.05 catalyst before and after 4 cycles of tests.

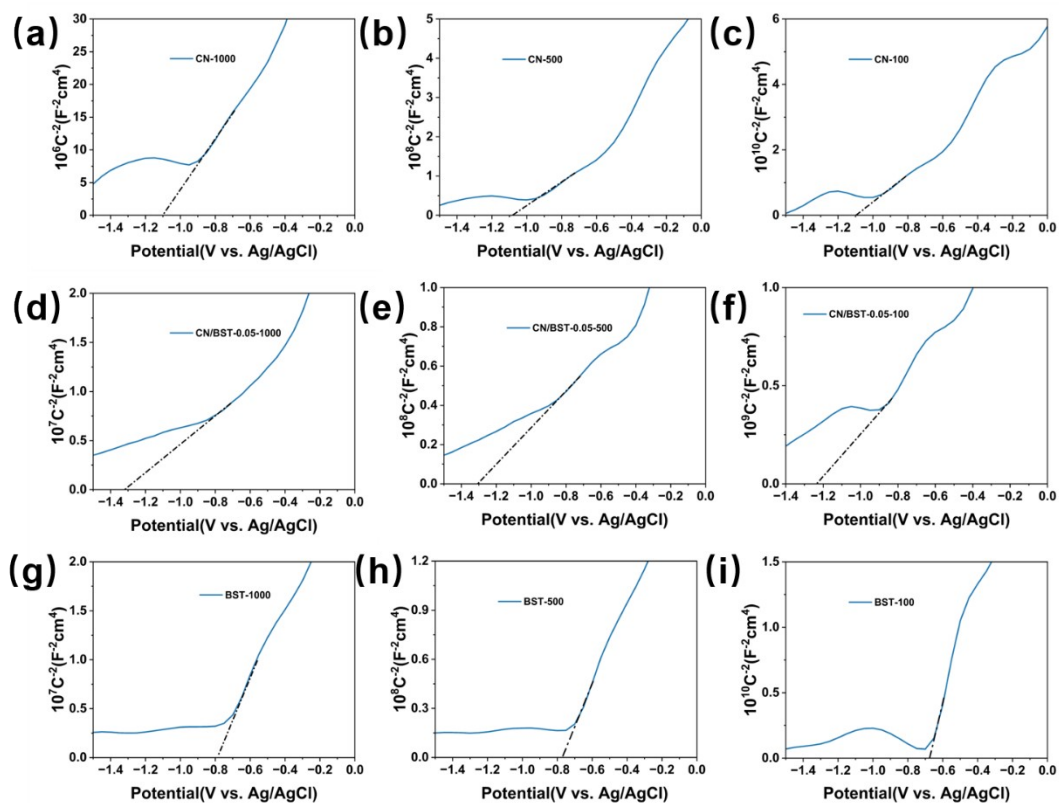

**Fig. S10.** Mott-Schottky plots under different frequency of (a-c)  $g\text{-C}_3\text{N}_4$  nanosheets (CN), (d-f) CN/BST-0.05 and (g-i) BST-CN.

**Table S1.** Summary of BET obtained parameters of g-C<sub>3</sub>N<sub>4</sub>, CN/BST-0.05 and BST series samples.

| <b>Sample</b>      | <b>Pore Volume</b><br><b>(cm<sup>3</sup> g<sup>-1</sup>)</b> | <b>Surface Area</b><br><b>(cm<sup>2</sup> g<sup>-1</sup>)</b> | <b>Pore Width</b><br><b>(nm)</b> |
|--------------------|--------------------------------------------------------------|---------------------------------------------------------------|----------------------------------|
| <b>CN</b>          | 0.569                                                        | 231.771                                                       | 27.043                           |
| <b>CN/BST-0.05</b> | 0.342                                                        | 136.162                                                       | 10.321                           |
| <b>BST</b>         | 1.8291                                                       | 50.9                                                          | 7.4410                           |

**Table S2.** The comparison of our results with those reported photocatalyst performance.

| Sample                                              | Reaction condition                   | HER ( $\mu\text{mol g}^{-1} \text{h}^{-1}$ ) | Ref.      |
|-----------------------------------------------------|--------------------------------------|----------------------------------------------|-----------|
| CN/BST-0.05                                         | Pt ( $\lambda \geq 320 \text{ nm}$ ) | 12470                                        | This work |
| CN/BST-0.05                                         | Pt ( $\lambda \geq 420 \text{ nm}$ ) | 5601                                         | This work |
| IR/CN                                               | Pt ( $\lambda \geq 420 \text{ nm}$ ) | 3882                                         | [S1]      |
| 3OZIS-S/CN                                          | Pt ( $\lambda \geq 420 \text{ nm}$ ) | 3215                                         | [S2]      |
| g-C <sub>3</sub> N <sub>4</sub> /Ni-P-3%            | No Pt                                | 1051                                         | [S3]      |
| CN <sub>700-210</sub>                               | Pt( $\lambda \geq 420 \text{ nm}$ )  | 830                                          | [S4]      |
| A-CGCN                                              | Pt ( $\lambda \geq 420 \text{ nm}$ ) | 1179                                         | [S5]      |
| tri-/tri-s-tri-C <sub>3</sub> N <sub>4</sub> -90    | Pt ( $\lambda \geq 420 \text{ nm}$ ) | 1600                                         | [S6]      |
| g- C <sub>3</sub> N <sub>4</sub> -Co <sub>2</sub> P | ( $\lambda \geq 420 \text{ nm}$ )    | 11120                                        | [S7]      |
| DCN-200                                             | Pt ( $\lambda \geq 420 \text{ nm}$ ) | 3980                                         | [S8]      |
| CN-TH <sub>3/3</sub>                                | Pt ( $\lambda \geq 420 \text{ nm}$ ) | 3806.5                                       | [S9]      |

## Reference

- [S1] W. Yu, X. Shan and Z. Zhao, *Appl. Catal. B: Environ.*, 2020, **269**, 118778.
- [S2] Y. Qin, Hong Li, J. Lu, Y. Feng, F. Meng, C. Ma, Y. Yan and M. Meng, *Appl. Catal. B: Environ.*, 2020, **277**, 119254.
- [S3] K. Qi, Y. Xie, R. Wang, S. Liu and Z. Zhao. *Appl. Surf. Sci.*, 2019, **466**, 847-853.
- [S4] L. Cui, X. Hou, H. Du and Y. Yuan, *ACS Appl. Mater. Inter.*, 2013, 23, **5**, 12533-12540.
- [S5] Z. Liu, G. Wang, H.-S. Chen and P. Yang, *Chem. Commun.*, 2018, **54**, 4720-4723.
- [S6] Z. X. Zeng, H. T. Yu, X. Quan, S. Chen and S. S. Zhang, *Appl. Catal. B-Environ.*, 2018, **227**, 153-160.

[S7] R. C. Shen, J. Xie, H. D. Zhang, A. P. Zhang, X. B. Chen and X. Li, *ACS Sustain. Chem. Eng.*, 2018, **6**, 816-826.

[S8] G. Liu, G. Zhao, W. Zhou, Y. Liu, H. Pang, H. Zhang, D. Hao, X. Meng, P. Li, T. Kako and J. Ye, *Adv. Funct. Mater.*, 2016, **26**, 6822-6829.

[S9] Z. Fang, Y. Bai, L. Li, D. Li, Y. Huang, R. Chen, W. Fan and W. Shi, *Nano Energ.*, 2020, **75**, 104865.
